# Supplementary material
Source: PubMed Central journal article supplement (PMC3962766)
Supplement: NIHMS535699-supplement-01.pdf [file NIHMS535699-supplement-01.pdf]

## Appendix 1. ICD-9-CM diagnosis and reason for visit codes used for this analysis.

|                           |                                                                                                                                                                   |
|---------------------------|-------------------------------------------------------------------------------------------------------------------------------------------------------------------|
| Diagnosis of BPH          | ICD-9-CM diagnosis codes: 594.1, 599.6, 599.69, 600.0, 600.1, 600.2, 600.21, 600.9, 600.91, 788.20, 788.21, 788.29, 788.4, 788.41, 788.42, 788.43, 788.61, 788.62 |
| Patient complaint of LUTS | Reason for visit codes: 1645.0, 1645.1, 1650.0, 1655.0, 1655.1, 1660.1, 1660.2, 1660.4, 1665.1, 1665.2, 1710.0, 1710.1                                            |
| Diagnosis of hypertension | ICD-9-CM diagnosis codes: 140.1, 140.11, 140.19                                                                                                                   |
| Diagnosis of UTI          | ICD-9-CM diagnosis codes: 159.5, 159.59, 160.11, 159.9, 160.1, 160.12, 160.13                                                                                     |

## Appendix 2. Drug codes used to identify BPH medication use.

| <b>Alpha-blockers</b>               | <b>Drug codes</b>                        |
|-------------------------------------|------------------------------------------|
| Doxazosin                           | 92120, 51973, 00726, 92012, 08162        |
| Terazosin                           | 94133, 56290, 00386, 15307               |
| Tamsulosin                          | 59731, 00053, 04121, 08006, 97126        |
| Alfuzosin                           | 04797, 70814, 06166, 04138               |
| Silodosin                           | 10370, 07354, 09797                      |
| <b>5-alpha reductase inhibitors</b> |                                          |
| Finasteride                         | 95177, 57218, 00563, 93127               |
| Dutasteride                         | 70675, 05194, 03002                      |
| <b>AB-5ARI combination</b>          |                                          |
| Dutasteride-tamsulosin              | 10532, 07634                             |
| <b>Anticholinergics</b>             |                                          |
| Flavoxate                           | 04069, 52275, 70784, 01425, 33300        |
| Oxybutynin                          | 22287, 00328, 54105, 09995               |
| Oxybutynin XR                       | 09834, 00003                             |
| Tolterodine                         | 01050, 04294, 59811, 98065               |
| Tolterodine LA                      | 01057                                    |
| Darifenacin                         | 70995, 05422, 06104, 05051               |
| Solifenacin                         | 70990, 05261, 05413, 05074               |
| Fesoterodine                        | 07162, 06104                             |
| Trospium                            | 10251, 71024, 10455, 04929, 05266, 08179 |
